# Supplementary material for: 1,2-, 1,3- and 1,4-Benzenedicarboxylates of Cd and Zn of different dimensionalities: Process of formation of the three-dimensional structure
Source: Royal Society of Chemistry journal article supplement (doi:10.1039/b504666a), 2005-01-01
Supplement: b504666a.pdf [file b504666a.pdf]

**Table 1.** Selected bond distances for **Ia** and **Ib**

| Compound <b>Ia</b> |              | Compound <b>Ib</b> |              |
|--------------------|--------------|--------------------|--------------|
| Bond               | Distance (Å) | Bond               | Distance (Å) |
| Cd(1)-O(1)         | 2.226(3)     | Cd(1)-O(1)         | 2.328(2)     |
| Cd(1)-O(2)         | 2.378(3)     | Cd(1)-O(2)         | 2.429(2)     |
| Cd(1)-O(3)         | 2.400(3)     | Cd(1)-O(3)#1       | 2.213(2)     |
| Cd(1)-O(4)         | 2.445(3)     | O(3)-Cd(1)#2       | 2.213(2)     |
| Cd(1)-N(1)         | 2.319(3)     | Cd(1)-O(5)         | 2.320(2)     |
| Cd(1)-N(2)         | 2.365(3)     | Cd(1)-N(1)         | 2.374(3)     |
| O(1)-C(18)         | 1.267(4)     | Cd(1)-N(2)         | 2.329(2)     |
| O(3)-C(11)         | 1.265(4)     | O(1)-C(11)         | 1.256(4)     |
| O(4)-C(11)         | 1.233(4)     | O(3)-C(18)         | 1.258(4)     |
| O(5)-C(18)         | 1.239(4)     | O(2)-C(11)         | 1.263(4)     |
| N(1)-C(1)          | 1.338(5)     | O(4)-C(18)         | 1.245(5)     |
| N(1)-C(5)          | 1.344(5)     | N(1)-C(1)          | 1.335(4)     |
| N(2)-C(10)         | 1.343(5)     | N(1)-C(5)          | 1.355(4)     |
| N(2)-C(6)          | 1.359(4)     | N(2)-C(6)          | 1.343(4)     |
|                    |              | N(2)-C(10)         | 1.349(4)     |

Symmetry transformations used to generate equivalent atoms: #1-x+1,-y,z+1/2 #2 -x+1,-y,z-1/2

**Table 2.** Selected bond angles for **Ia** and **Ib**

| Compound <b>Ia</b> |            | Compound <b>Ib</b> |           |
|--------------------|------------|--------------------|-----------|
| Bond               | Amplitude  | Bond               | Amplitude |
| O(1)-Cd(1)-O(2)    | 93.52(10)  | O(1)-Cd(1)-O(2)    | 55.27(7)  |
| O(1)-Cd(1)-O(3)    | 115.51(10) | O(3)#1-Cd(1)-O(1)  | 152.30(8) |
| O(1)-Cd(1)-O(4)    | 165.32(10) | O(3)#1-Cd(1)-O(2)  | 98.50(8)  |
| O(2)-Cd(1)-O(3)    | 85.06(10)  | O(5)-Cd(1)-O(1)    | 95.94(8)  |
| O(2)-Cd(1)-O(4)    | 76.43(9)   | O(5)-Cd(1)-O(2)    | 117.93(8) |
| O(3)-Cd(1)-O(4)    | 53.72(9)   | O(3)#1-Cd(1)-O(5)  | 88.93(8)  |
| O(1)-Cd(1)-N(1)    | 110.85(11) | O(1)-Cd(1)-N(1)    | 100.13(8) |
| O(1)-Cd(1)-N(2)    | 97.48(10)  | O(1)-Cd(1)-N(2)    | 91.20(8)  |
| N(1)-Cd(1)-O(2)    | 150.92(10) | N(1)-Cd(1)-O(2)    | 88.48(9)  |
| N(2)-Cd(1)-O(2)    | 90.98(10)  | N(2)-Cd(1)-O(2)    | 136.81(8) |
| N(1)-Cd(1)-O(3)    | 97.76(10)  | O(3)#1-Cd(1)-N(1)  | 86.51(9)  |
| N(1)-Cd(1)-O(4)    | 82.00(9)   | O(3)#1-Cd(1)-N(2)  | 116.19(8) |
| N(2)-Cd(1)-O(3)    | 146.94(9)  | O(5)-Cd(1)-N(1)    | 153.59(8) |
| N(2)-Cd(1)-O(4)    | 93.42(9)   | O(5)-Cd(1)-N(2)    | 89.03(8)  |
| N(1)-Cd(1)-N(2)    | 70.91(10)  | N(2)-Cd(1)-N(1)    | 69.91(8)  |
| O(5)-C(18)-O(1)    | 123.7(3)   | O(1)-C(11)-O(2)    | 122.5(3)  |
| O(4)-C(11)-O(3)    | 122.5(4)   |                    |           |

Symmetry transformations used to generate equivalent atoms: #1-x+1,-y,z+1/2 #2 -x+1,-y,z-1/2

**Table 2.** Selected bond distances and bond angles for **II**

| Bond distances |              | Bond angles        |            |
|----------------|--------------|--------------------|------------|
| Bond           | Distance (Å) | Bond               | Amplitude  |
| Cd(1)-O(1)     | 2.531(3)     | O(2)-Cd(1)-O(1)    | 53.34(9)   |
| Cd(1)-O(2)     | 2.304(2)     | O(3)-Cd(1)-O(1)    | 97.79(11)  |
| Cd(1)-O(3)     | 2.190(2)     | O(3)-Cd(1)-O(2)    | 132.03(9)  |
| Cd(1)-O(5)     | 2.349(2)     | O(5)-Cd(1)-O(1)    | 130.29(10) |
| Cd(1)-N(1)     | 2.355(3)     | O(2)-Cd(1)-O(5)    | 89.72(9)   |
| Cd(1)-N(2)     | 2.391(3)     | O(3)-Cd(1)-O(5)    | 83.07(9)   |
| Cd(2)-O(11)    | 2.407(2)     | N(1)-Cd(1)-O(1)    | 79.46(10)  |
| Cd(2)-O(11)#1  | 2.538(2)     | N(2)-Cd(1)-O(1)    | 143.57(11) |
| Cd(2)-O(12)    | 2.403(2)     | O(2)-Cd(1)-N(1)    | 114.99(9)  |
| Cd(2)-O(13)    | 2.177(2)     | O(2)-Cd(1)-N(2)    | 123.14(9)  |
| Cd(2)-N(3)     | 2.350(3)     | O(3)-Cd(1)-N(1)    | 91.26(9)   |
| Cd(2)-N(4)     | 2.342(3)     | O(3)-Cd(1)-N(2)    | 102.82(10) |
| O(1)-C(51)     | 1.226(4)     | O(5)-Cd(1)-N(1)    | 150.16(10) |
| O(2)-C(51)     | 1.271(4)     | O(5)-Cd(1)-N(2)    | 82.25(9)   |
| O(3)-C(41)     | 1.268(4)     | N(1)-Cd(1)-N(2)    | 70.45(9)   |
| O(4)-C(41)     | 1.243(4)     | O(11)-Cd(2)-(11)#1 | 74.05(10)  |
| O(11)-C(48)    | 1.260(4)     | O(12)-Cd(2)-O(11)  | 54.34(8)   |
| O(12)-C(48)    | 1.261(4)     | O(12)-Cd(2)-(11)#1 | 113.45(9)  |
| O(13)-C(58)    | 1.267(4)     | O(13)-Cd(2)-O(11)  | 120.72(10) |
| O(14)-C(58)    | 1.227(4)     | O(13)-Cd(2)-(11)#1 | 85.45(9)   |
| N(1)-C(1)      | 1.326(4)     | O(13)-Cd(2)-O(12)  | 87.66(9)   |
| N(1)-C(12)     | 1.357(4)     | N(3)-Cd(2)-O(11)   | 84.07(9)   |
| N(2)-C(10)     | 1.330(4)     | N(3)-Cd(2)-O(11)#1 | 129.82(9)  |
| N(2)-C(11)     | 1.365(4)     | N(4)-Cd(2)-O(11)   | 116.29(9)  |
| N(3)-C(21)     | 1.329(4)     | N(4)-Cd(2)-O(11)#1 | 78.76(9)   |
| N(3)-C(32)     | 1.365(4)     | N(3)-Cd(2)-O(12)   | 86.58(9)   |
| N(4)-C(30)     | 1.326(5)     | N(4)-Cd(2)-O(12)   | 157.43(9)  |
| N(4)-C(31)     | 1.359(4)     | N(4)-Cd(2)-N(3)    | 71.45(10)  |
|                |              | O(1)-C(51)-O(2)    | 121.6(3)   |
|                |              | O(4)-C(41)-O(3)    | 126.5(3)   |
|                |              | O(11)-C(48)-O(12)  | 121.2(3)   |
|                |              | O(14)-C(58)-O(13)  | 123.3(3)   |

Symmetry transformations used to generate equivalent atoms: #1-x,y,-z+1/2

**Table 3.** Selected bond distances for **III**, **IV** and **V**

| <b>III</b> |              | <b>IV</b>     |              | <b>V</b>     |              |
|------------|--------------|---------------|--------------|--------------|--------------|
| Bond       | Distance (Å) | Bond          | Distance (Å) | Bond         | Distance (Å) |
| Zn(1)-O(1) | 2.392(2)     | Cd(1)-O(1)    | 2.238(2)     | Cd(1)-O(1)   | 2.340(3)     |
| Zn(1)-O(2) | 2.124(2)     | Cd(1)-O(1)#1  | 2.238(2)     | Cd(1)-O(2)   | 2.591(3)     |
| Zn(1)-O(3) | 1.996(2)     | Cd(1)-O(2)    | 2.679(2)     | O(2)-Cd(1)#1 | 2.374(3)     |
| Zn(1)-O(5) | 2.124(2)     | Cd(1)-O(2) #1 | 2.679(2)     | Cd(1)-O(2)#1 | 2.374(3)     |
| Zn(1)-N(1) | 2.143(2)     | Cd(1)-O(2)#2  | 2.381(2)     | Cd(1)-O(3)   | 2.348(3)     |
| Zn(1)-N(2) | 2.158(2)     | Cd(1)-O(2)#3  | 2.381(2)     | Cd(1)-O(4)   | 2.430(3)     |
| O(1)-C(21) | 1.245(4)     | Cd(1)-O(100)  | 2.246(4)     | Cd(1)-N(1)   | 2.340(3)     |
| O(2)-C(21) | 1.267(3)     | O(1)-C(1)     | 1.249(4)     | Cd(1)-N(2)   | 2.406(3)     |
| O(3)-C(28) | 1.271(3)     | O(2)-C(1)     | 1.271(4)     | O(1)-C(21)   | 1.251(5)     |
| N(2)-C(10) | 1.330(4)     |               |              | N(1)-C(1)    | 1.322(5)     |
| N(2)-C(11) | 1.357(4)     |               |              | N(1)-C(12)   | 1.359(5)     |
|            |              |               |              | N(2)-C(10)   | 1.329(5)     |
|            |              |               |              | N(2)-C(11)   | 1.356(5)     |

Symmetry transformations used to generate equivalent atoms: #1  $x, -y+1/2, -z+1$  #2  $-x+2, y+1/2, z$   
 #3  $-x+2, -y, -z+1$  for **IV** and #1  $-x, -y+2, -z+1$  for **V**

**Table 7** Selected bond angles for **III**, **IV** and **V**

| <b>III</b>      |           | <b>IV</b>           |            | <b>V</b>          |            |
|-----------------|-----------|---------------------|------------|-------------------|------------|
| Bond            | Amplitude | Bond                | Amplitude  | Bond              | Amplitude  |
| O(2)-Zn(1)-O(1) | 57.81(7)  | O(1)-Cd(1)-O(1)#1   | 163.50(13) | O(1)-Cd(1)-O(2)   | 52.73(10)  |
| O(3)-Zn(1)-O(1) | 160.36(8) | O(1)-Cd(1)-O(100)   | 98.25(6)   | O(1)-Cd(1)-O(2)#1 | 124.05(11) |
| O(5)-Zn(1)-O(1) | 83.43(8)  | O(1)#1-Cd(1)-O(100) | 98.25(6)   | O(1)-Cd(1)-O(3)   | 113.98(12) |
| O(3)-Zn(1)-O(2) | 105.23(8) | O(1)#1-Cd(1)-O(2)#2 | 96.30(9)   | O(1)-Cd(1)-O(4)   | 84.24(11)  |
| O(5)-Zn(1)-O(2) | 94.59(8)  | O(1)-Cd(1)-O(2)#2   | 84.50(9)   | O(2)#1-Cd(1)-O(2) | 78.22(10)  |
| O(3)-Zn(1)-O(5) | 88.65(8)  | O(100)-Cd(1)-O(2)#2 | 87.22(5)   | O(3)-Cd(1)-O(2)   | 89.07(10)  |
| N(1)-Zn(1)-O(1) | 95.38(8)  | O(1)-Cd(1)-O(2)#3   | 96.30(9)   | O(3)-Cd(1)-O(2)#1 | 87.00(11)  |
| N(2)-Zn(1)-O(1) | 86.70(8)  | O(1)#1-Cd(1)-O(2)#3 | 84.50(9)   | O(4)-Cd(1)-O(2)   | 106.76(10) |
| O(2)-Zn(1)-N(1) | 151.68(8) | O(100)-Cd(1)-O(2)#3 | 87.22(5)   | O(2)#1-Cd(1)-O(4) | 140.81(10) |
| O(3)-Zn(1)-N(1) | 102.69(9) | O(2)#2-Cd(1)-O(2)#3 | 174.45(11) | O(3)-Cd(1)-O(4)   | 54.86(10)  |
| O(3)-Zn(1)-N(2) | 104.59(9) | O(1)-C(1)-O(2)      | 121.4(3)   | O(1)-Cd(1)-N(1)   | 87.36(11)  |
| O(5)-Zn(1)-N(2) | 163.74(9) |                     |            | N(1)-Cd(1)-O(2)#1 | 80.92(11)  |
| O(4)-C(28)-O(3) | 125.2(3)  |                     |            | N(2)-Cd(1)-O(2)   | 173.07(10) |
| O(1)-C(21)-O(2) | 121.8(3)  |                     |            | N(1)-Cd(1)-O(2)   | 105.42(11) |
|                 |           |                     |            | O(2)#1-Cd(1)-N(2) | 95.58(11)  |
|                 |           |                     |            | N(1)-Cd(1)-O(3)   | 158.65(12) |
|                 |           |                     |            | O(3)-Cd(1)-N(2)   | 93.70(11)  |
|                 |           |                     |            | N(1)-Cd(1)-O(4)   | 131.47(11) |
|                 |           |                     |            | N(2)-Cd(1)-O(4)   | 79.98(11)  |
|                 |           |                     |            | N(1)-Cd(1)-N(2)   | 70.24(12)  |
|                 |           |                     |            | O(1)-C(21)-O(2)   | 122.2(4)   |
|                 |           |                     |            | O(4)-C(31)-O(3)   | 122.1(4)   |

Symmetry transformations used to generate equivalent atoms: #1  $x, -y+1/2, -z+1$  #2  $-x+2, y+1/2, z$   
 #3  $-x+2, -y, -z+1$  for **IV** and #1  $-x, -y+2, -z+1$  for **V**
